# Supplementary material
Source: HighWire-hosted journal article supplement (http://rc.rcjournal.com/highwire/filestream/24665/field_highwire_adjunct_files/4/rc-10652-File006.docx)
Supplement: rc-10652-File006.docx [file rc-10652-File006.docx]

**Supplemental Table 3**: Outcome and length metrics according to spontaneous breathing trial exposure prior to extubation and subdivided by extubation failure risk

| **Outcomes** | **No SBT** | **Any SBT** | ***p* value** |
| --- | --- | --- | --- |
| **Invasive Mechanical Ventilation Encounters, N**  *Standard Extubation Failure Risk*  *High Extubation Failure Risk* | 180 (25.6)  135 (75)  45 (25) | 523 (74.4)  358 (68.5)  165 (31.5) | n/a |
| 0.098 |
| **Primary Outcome Variables** |  |  |  |
| **Extubation Failure Rate, N (%)**  *Standard Extubation Failure Risk*  *High Extubation Failure Risk* | 12 (6.7)  4 (3)  8 (17.8) | 42 (8)  26 (7.3)  16 (9.6) | 0.55  0.075  0.13 |
| **Rescue Non-Invasive Ventilation Rate, N (%)***  *Standard Extubation Failure Risk*  *High Extubation Failure Risk* | 1 (0.6)  1 (0.8)  0 | 42 (8.6)  22 (6.3)  20 (14.8) | <0.001  0.011  0.027 |
| **Exploratory Outcome Variables** |  |  |  |
| **Median PICU Length of Stay, Days (IQR)**  *Standard Extubation Failure Risk*  *High Extubation Failure Risk* | 0.9 (0.6-1.9)  0.9 (0.6-1.3)  1.9 (0.8-6.6) | 4.1 (2.2-8.6)  3.8 (2-7.5)  4.9 (2.5-11.3) | <0.001  <0.001  <0.001 |
| **Median Days of Invasive Mechanical Ventilation at First Extubation (IQR)**  *Standard Extubation Failure Risk*  *High Extubation Failure Risk* | 0.3 (0.1-0.6)  0.2 (0.1-0.4)  0.6 (0.2-1) | 2.3 (1-4.6)  2.2 (0.9-4.4)  2.7 (1.3-4.9) | <0.001  <0.001  <0.001 |

*Excluding n=36 requiring chronic or extubated to planned non-invasive ventilation; Interquartile Range (IQR), Spontaneous Breathing Trial (SBT)
